# Supplementary material
Source: PubMed Central journal article supplement (PMC2823576)
Supplement: jcs.058511_12.pdf [file jcs.058511_12.pdf]

**Table S1:** Genes more than 1.4 fold up-regulated in response to DHH1 overexpression. For all genes, the ratio on the dhh1 E182Q microarray is shown. Genes up-regulated on DHH1 overexpression, but down-regulated (induced/uninduced <1) on the dhh1 E182Q microarray are shadowed.

| gene ID        | DHH1 overexpression | dhh1 E182Q        | identity                                       |
|----------------|---------------------|-------------------|------------------------------------------------|
|                | induced/uninduced   | induced/uninduced |                                                |
|                | microarray          | microarray        |                                                |
| Tb927.1.4630   | 2.57                | 8.82              | conserved - TM                                 |
| Tb927.8.7610   | 2.24                | 2.05              | amino acid transporter 1                       |
| Tb927.1.4550   | 2.14                | 4.31              | conserved                                      |
| Tb927.7.6000   | 2.03                | 2.89              | mitochondrial DNA ligase                       |
| Tb927.7.5980   | 1.86                | 1.99              | conserved MFS-1 TM                             |
| Tb927.8.7620   | 1.78                | 1.63              | amino acid transporter 1                       |
| Tb10.6k15.2030 | 1.77                | 6.19              | glucose transporter                            |
| Tb927.7.5970   | 1.74                | 0.74              | conserved sig seq MFS-1 TM                     |
| Tb10.6k15.3640 | 1.72                | 3.57              | alternative oxidase                            |
| Tb927.8.7670   | 1.71                | 1.96              | amino acid transporter                         |
| Tb927.8.5350   | 1.69                | 2.34              | conserved                                      |
| Tb927.7.5960   | 1.67                | 2.24              | conserved MFS-1 TM                             |
| Tb10.6k15.2040 | 1.66                | 2.95              | hexose transporter                             |
| Tb10.70.4080   | 1.66                | 2.93              | conserved sig seq                              |
| Tb11.02.1100   | 1.66                | 3.78              | nucleoside transporter 8.1                     |
| Tb927.3.4270   | 1.66                | 3.13              | conserved MORN repeat protein                  |
| Tb927.8.4060   | 1.65                | 3.54              | flagellum-adhesion glycoprotein                |
| Tb11.02.4730   | 1.59                | 2.06              | DNA repair/recombination helicase protein PIF1 |
| Tb927.1.2160   | 1.59                | 4.84              | calpain-like protein fragment                  |
| Tb11.02.3860   | 1.54                | 1.66              | conserved MFS-1 TM                             |
| Tb10.389.1810  | 1.53                | 1.29              | kynurenine aminotransferase                    |
| Tb927.2.2770   | 1.53                | 2.12              | conserved                                      |
| Tb11.02.3760   | 1.52                | 2.58              | hypothetical protein                           |
| Tb10.70.3290   | 1.5                 | 1.57              | DHH1                                           |
| Tb927.3.5080   | 1.49                | 3.69              | conserved, PSP1                                |
| Tb10.6k15.2020 | 1.47                | 0.98              | glucose transporter 2A                         |
| Tb927.3.3730   | 1.47                | 4.7               | ABC transporter                                |
| Tb927.4.4000   | 1.47                | 2.29              | amino acid transporter                         |
| Tb11.01.7600   | 1.45                | 2.38              | amino acid transporter                         |
| Tb10.61.1400   | 1.44                | 1.86              | conserved                                      |
| Tb10.70.4590   | 1.44                | 2.25              | conserved sig seq                              |
| Tb09.160.1520  | 1.43                | 3.11              | conserved - TM                                 |
| Tb10.6k15.2180 | 1.43                | 1.79              | cytochrome oxidase subunit IX                  |
| Tb11.47.0021   | 1.42                | 5.43              | conserved                                      |
| Tb927.5.2430   | 1.42                | 1.79              | membrane transporter                           |
| Tb10.389.0020  | 1.41                | 3.4               | phosphatidic acid phosphatase alpha            |
| Tb927.2.4610   | 1.41                | 2.09              | branched-chain amino acid aminotransferase     |
| Tb927.8.7650   | 1.41                | 1.47              | amino acid transporter                         |
| Tb927.6.5090   | 1.4                 | 2.14              | conserved-TM                                   |
| Tb927.7.210    | 1.4                 | 1.67              | proline oxidase                                |
| Tb927.7.5940   | 1.4                 | 2.03              | conserved MFS-1 TM sig seq                     |
