# Supplementary material
Source: PubMed Central journal article supplement (PMC2823576)
Supplement: jcs.058511_13.pdf [file jcs.058511_13.pdf]

**Table S2:** Genes more than 1.33 fold down-regulated in response to DHH1 overexpression. For all genes, the ratio on the dhh1 E182Q microarray is shown.

| gene ID        | DHH1 overexpression<br>induced/uninduced | dhh1 E182Q<br>induced/uninduced | identity                                               |
|----------------|------------------------------------------|---------------------------------|--------------------------------------------------------|
|                | microarray                               | microarray                      |                                                        |
| Tb927.6.3490   | 0.488                                    | 0.353                           | ZFP1                                                   |
| Tb09.160.5480  | 0.595                                    | 0.510                           | purine nucleoside transporter TbNT10                   |
| Tb11.02.2310   | 0.645                                    | 0.461                           | prostaglandin f synthase                               |
| Tb927.6.700    | 0.645                                    | 0.394                           | alanyl-tRNA synthetase, putative                       |
| Tb927.8.2540   | 0.654                                    | 0.412                           | 3-ketoacyl-CoA thiolase, putative                      |
| Tb11.02.0290   | 0.658                                    | 0.313                           | succinyl-coA:3-ketoacid-CoA transferase, mitochondrial |
| Tb10.70.0820   | 0.667                                    | 0.433                           | universal minicircle sequence binding protein          |
| Tb927.3.930    | 0.671                                    | 0.508                           | dynein heavy chain, putative                           |
| Tb11.01.0725   | 0.680                                    | 0.820                           | cation transporter, putative                           |
| Tb10.6k15.3850 | 0.690                                    | 0.595                           | glyceraldehyde 3-phosphate dehydrogenase cytosolic     |
| Tb10.61.0980   | 0.699                                    | 0.228                           | glycosomal malate dehydrogenase                        |
| Tb11.02.0760   | 0.699                                    | 0.518                           | dynein heavy chain, putative                           |
| Tb927.4.1330   | 0.699                                    | 0.694                           | DNA topoisomerase IB large subunit                     |
| Tb11.01.0720   | 0.730                                    | 0.365                           | cation transporter, putative                           |
| Tb927.5.3330   | 0.730                                    | 0.787                           | hypothetical protein                                   |
| Tb927.7.920    | 0.730                                    | 0.654                           | dynein heavy chain, putative                           |
| Tb11.03.0390   | 0.735                                    | 0.478                           | protein phosphatase 2C, putative                       |
| Tb927.1.2260   | 0.735                                    | 0.331                           | calpain-like protein fragment, putative                |
| Tb927.7.5210   | 0.735                                    | 0.633                           | conserved, DUF89                                       |
| Tb927.7.960    | 0.735                                    | 0.680                           | protein kinase, putative                               |
| Tb11.02.0030   | 0.741                                    | 0.758                           | dynein heavy chain, putative                           |
| Tb11.02.4440   | 0.741                                    | 0.658                           | aminopeptidase, putative                               |
| Tb11.46.0009   | 0.741                                    | 0.685                           | zink finger protein, putative                          |
| Tb09.160.3590  | 0.746                                    | 0.503                           | cAMP-specific phosphodiesterase                        |
| Tb927.2.4710   | 0.746                                    | 0.559                           | RNA-binding protein, putative                          |
