# Supplementary material
Source: PubMed Central journal article supplement (PMC2823576)
Supplement: jcs.058511_14.pdf [file jcs.058511_14.pdf]

**Table S3:** Predicted trans-membrane helices in the genes that are more than two fold up-regulated by the expression of dhh1 E182Q.

| gene ID        | dhh1 E182Q induced/uninduced | number of trans-membrane helices (predicted) | identity                             |
|----------------|------------------------------|----------------------------------------------|--------------------------------------|
|                | microarray                   |                                              |                                      |
| Tb927.1.4630   | 8.8                          | -                                            | conserved - TM                       |
| Tb10.6k15.2030 | 6.2                          | 12                                           | glucose transporter                  |
| Tb11.47.0021   | 5.4                          | -                                            | conserved                            |
| Tb927.1.2160   | 4.8                          | -                                            | calpain-like protein fragment        |
| Tb927.3.3730   | 4.7                          | 11                                           | ABC transporter                      |
| Tb927.1.4550   | 4.3                          | 3                                            | conserved                            |
| Tb11.01.3915   | 4.2                          | -                                            | RBP5                                 |
| Tb11.02.1100   | 3.8                          | 9                                            | nucleoside transporter 8.1           |
| Tb927.3.5080   | 3.7                          | -                                            | conserved PSP1 domain                |
| Tb10.6k15.3640 | 3.6                          | 1                                            | alternative oxidase                  |
| Tb927.8.4060   | 3.5                          | 2                                            | flagellum-adhesion glycoprotein      |
| Tb10.389.0020  | 3.4                          | 1                                            | phosphatidic acid phosphatase        |
| Tb927.5.360    | 3.4                          | 1                                            | ISG75                                |
| Tb10.61.2680   | 3.3                          | -                                            | pyruvate kinase 1                    |
| Tb11.02.2360   | 3.3                          | -                                            | unique - sig seq                     |
| Tb927.3.4270   | 3.1                          | -                                            | conserved MORN repeat protein        |
| Tb09.160.1520  | 3.1                          | 1                                            | conserved - TM                       |
| Tb10.6k15.2040 | 3.0                          | 12                                           | glucose transporter                  |
| Tb10.70.4080   | 2.9                          | -                                            | conserved - sig seq                  |
| Tb927.7.6000   | 2.9                          | 13                                           | mitochondrial DNA ligase             |
| Tb927.2.4670   | 2.8                          | 4                                            | conserved - TM                       |
| Tb927.4.1230   | 2.7                          | -                                            | unique                               |
| Tb11.01.6420   | 2.6                          | -                                            | conserved PIF1                       |
| Tb11.02.3760   | 2.6                          | 2                                            | conserved - TM                       |
| Tb10.389.0740  | 2.6                          | -                                            | ZC3H38 zinc finger                   |
| Tb927.3.4100   | 2.5                          | 14                                           | conserved - TM                       |
| Tb927.1.2150   | 2.46                         | -                                            | calpain-like protein fragment        |
| Tb11.01.7600   | 2.38                         | 11                                           | amino acid transporter, putative     |
| Tb927.8.5350   | 2.34                         | -                                            | hypothetical protein, conserved      |
| Tb10.61.0380   | 2.33                         | 12                                           | glycerol uptake protein, putative    |
| Tb927.5.3850   | 2.33                         | -                                            | conserved                            |
| Tb927.3.4070   | 2.32                         | 12                                           | conserved, MFS-1                     |
| Tb927.8.5050   | 2.30                         | -                                            | conserved, OUT like cystein protease |
| Tb927.4.4000   | 2.29                         | 11                                           | amino acid transporter, putative     |
| Tb927.4.4020   | 2.29                         | 11                                           | amino acid transporter, putative     |
| Tb927.6.3480   | 2.27                         | -                                            | RNA binding protein, putative        |
| Tb927.7.5370   | 2.26                         | -                                            | conserved, actin binding             |
| Tb10.70.4590   | 2.25                         | -                                            | conserved, sig seq                   |
| Tb927.7.5960   | 2.24                         | 13                                           | hypothetical protein, conserved      |
| Tb10.61.1730   | 2.22                         | -                                            | conserved                            |
| Tb927.3.1410   | 2.22                         | -                                            | cytochrome c oxidase VII             |
| Tb927.8.7980   | 2.21                         | 14                                           | TVPI                                 |
| Tb11.02.2630   | 2.18                         | -                                            | protein phosphatase                  |
| Tb09.244.2550  | 2.16                         | -                                            | unique                               |

|               |      |    |                                                             |
|---------------|------|----|-------------------------------------------------------------|
| Tb927.8.480   | 2.16 | 6  | phosphatidic acid phosphatase protein                       |
| Tb09.160.5190 | 2.15 | 1  | conserved sig seq                                           |
| Tb927.1.700   | 2.15 | -  | phosphoglycerate kinase C                                   |
| Tb927.5.890   | 2.15 | 10 | oligosaccharyl transferase subunit, putative                |
| Tb927.6.5090  | 2.14 | 9  | conserved                                                   |
| Tb09.244.2750 | 2.13 | -  | conserved                                                   |
| Tb10.70.7100  | 2.12 | -  | serine carboxypeptidase III precursor                       |
| Tb927.2.2770  | 2.12 | -  | conserved                                                   |
| Tb927.8.4110  | 2.12 | 2  | flagellum-adhesion glycoprotein, putative                   |
| Tb927.1.600   | 2.11 | 10 | phosphate-repressible phosphate permease                    |
| Tb927.8.2930  | 2.11 | -  | mannosyl-oligosaccharide 1,2-alpha-mannosidase IB, putative |
| Tb927.5.4020  | 2.10 | -  | conserved, GPI anchor                                       |
| Tb927.7.2160  | 2.10 | -  | conserved                                                   |
| Tb927.2.4610  | 2.09 | -  | branched-chain amino acid aminotransferase                  |
| Tb927.7.5550  | 2.09 | -  | conserved TLD                                               |
| Tb11.02.4730  | 2.06 | -  | DNA repair/recombination helicase protein PIF1, putative    |
| Tb927.8.7610  | 2.05 | 11 | amino acid transporter 1                                    |
| Tb927.5.610   | 2.04 | 2  | acidic phosphatase                                          |
| Tb10.389.1170 | 2.03 | 7  | P-type H <sup>+</sup> -ATPase, putative                     |
| Tb927.7.5940  | 2.03 | 14 | conserved, MFS-1                                            |
| Tb09.211.3500 | 2.02 | -  | conserved sig seq                                           |
| Tb927.3.3960  | 2.02 | -  | RNA binding protein, putative                               |
| Tb927.3.3930  | 2.00 | -  | RNA binding protein, putative                               |
