# Supplementary material
Source: PubMed Central journal article supplement (PMC2823576)
Supplement: jcs.058511_15.pdf [file jcs.058511_15.pdf]

**Table S4:** Genes up-regulated in bloodstream form cells (ratio bloodstream/procyclic >2.5) are shown in comparison with their ratio on dhh1 E182Q expression (induced/uninduced).

| gene ID        | bloodstream/<br>procyclic | dhh1 E182Q<br>induced/<br>uninduced | identity                                  |
|----------------|---------------------------|-------------------------------------|-------------------------------------------|
|                | microarray                | microarray                          |                                           |
| Tb927.3.4070   | 38.99                     | 2.32                                | conserved - TM                            |
| Tb927.2.3270   | 19.69                     | 1.03                                | ISG65                                     |
| Tb927.2.3280   | 19.56                     | 0.99                                | ISG65                                     |
| Tb11.01.4950   | 18.3                      | 1                                   | RNA helicase                              |
| Tb10.70.5820   | 17.79                     | 0.96                                | hexokinase                                |
| Tb927.4.4870   | 16.95                     | 1.07                                | amino acid transporter                    |
| Tb927.3.600    | 14.36                     | 1.02                                | unique                                    |
| Tb927.5.1410   | 11.82                     | 0.94                                | ISG64                                     |
| Tb927.5.610    | 10.99                     | 2.04                                | p'tase ISG-like                           |
| Tb927.5.1390   | 10.67                     | 0.93                                | ISG64                                     |
| Tb927.8.480    | 10.09                     | 2.16                                | phosphatidic acid p'tase                  |
| Tb10.61.1750   | 9.82                      | 1.73                                | C-terminal motor kinesin                  |
| Tb927.1.700    | 9.1                       | 2.15                                | gPGK                                      |
| Tb11.02.0010   | 8.94                      | 1.14                                | N-term acylated conserved                 |
| Tb10.70.5290   | 8.8                       | 1.76                                | MSP-C (gp63)                              |
| Tb10.389.0740  | 8.43                      | 2.56                                | ZC3H38 zinc finger                        |
| Tb927.4.1230   | 7.79                      | 2.72                                | unique                                    |
| Tb927.8.6730   | 7.63                      | 1.43                                | unknown - TM                              |
| Tb927.7.6490   | 7.15                      | 1.78                                | unique - sig seq                          |
| Tb927.4.4580   | 6.84                      | 1.56                                | conserved                                 |
| Tb10.61.2680   | 6.57                      | 3.31                                | pyruvate kinase 1                         |
| Tb10.6k15.3640 | 6.43                      | 3.57                                | alternative oxidase                       |
| Tb927.2.3320   | 6.38                      | 1                                   | ISG65                                     |
| Tb927.2.6000   | 6.34                      | 1.17                                | GPI-PLC                                   |
| Tb927.2.6210   | 6.29                      | 0.99                                | iron/ascorbate oxidoreductase             |
| Tb927.4.4020   | 6.28                      | 2.29                                | AAT                                       |
| Tb927.5.630    | 6.26                      | 1.86                                | p'tase ISG-like                           |
| Tb927.7.7510   | 6.14                      | 1.24                                | unique                                    |
| Tb10.70.7750   | 6.03                      | 1.49                                | conserved - TM                            |
| Tb09.211.3955  | 6.03                      | 1.52                                | heat shock protein binding                |
| Tb927.8.2780   | 6.02                      | 1.3                                 | RBP10                                     |
| Tb11.02.5540   | 5.78                      | 1.74                                | conserved - TM                            |
| Tb927.8.6710   | 5.75                      | 1.5                                 | conserved - TM                            |
| Tb927.7.6480   | 5.71                      | 0.81                                | conserved                                 |
| Tb927.5.310    | 5.7                       | 1.93                                | clustered by GRESAG and iron asc oxidored |

|                |      |      |                                      |
|----------------|------|------|--------------------------------------|
| Tb927.5.1040   | 5.64 | 0.98 | unique                               |
| Tb927.1.3830   | 5.58 | 1.48 | glucose-6-phosphate isomerase        |
| Tb09.160.3090  | 5.32 | 1.09 | HSP70                                |
| Tb927.5.4570   | 5.27 | 1.38 | conserved - TM                       |
| Tb10.70.5300   | 5.27 | 1.93 | unique                               |
| Tb927.4.710    | 5.25 | 1.19 | conserved                            |
| Tb10.389.0720  | 5.2  | 1.21 | conserved                            |
| Tb927.5.350    | 5.14 | 1.09 | ISG75                                |
| Tb10.6k15.2030 | 5.14 | 6.19 | glucose transporter                  |
| Tb927.7.4260   | 5.12 | 1.61 | conserved - TM                       |
| Tb10.70.5100   | 5.03 | 1.27 | lysosomal alpha-mannosidase          |
| Tb927.8.7780   | 5.01 | 1.49 | conserved                            |
| Tb10.70.6350   | 5    | 0.70 | conserved                            |
| Tb927.8.7970   | 4.81 | 1.31 | unique                               |
| Tb927.3.4110   | 4.78 | 1.41 | conserved - TM                       |
| Tb927.7.6570   | 4.77 | 1.04 | conserved - sig seq                  |
| Tb927.7.2650   | 4.75 | 1.54 | conserved                            |
| Tb10.6k15.3560 | 4.66 | 1.29 | p'tase ISG-like                      |
| Tb11.01.0120   | 4.51 | 1.29 | haloacid dehydrogenase-like          |
| Tb10.61.3130   | 4.51 | 1.14 | conserved                            |
| Tb927.2.6320   | 4.48 | 0.99 | adenosine transporter                |
| Tb927.5.360    | 4.46 | 3.4  | ISG75                                |
| Tb11.01.3940   | 4.45 | 1.41 | RBP9                                 |
| Tb927.7.6600   | 4.4  | 1.54 | conserved - sig seq                  |
| Tb09.160.5500  | 4.39 | 1.01 | unique - TM                          |
| Tb11.01.3240   | 4.36 | 0.98 | trans-sialidase                      |
| Tb10.61.0380   | 4.3  | 2.33 | glycerol uptake                      |
| Tb10.6k15.2290 | 4.27 | 1.48 | sig seq protein disulphide isomerase |
| Tb927.2.3340   | 4.26 | 1.01 | conserved                            |
| Tb10.70.2420   | 4.21 | 1.08 | GPI inositol deacylase               |
| Tb09.211.3880  | 4.17 | 1.32 | conserved - TM                       |
| Tb927.6.3120   | 4.15 | 1.22 | DNA J                                |
| Tb927.5.4580   | 4.13 | 1.55 | conserved - TM                       |
| Tb927.8.2280   | 4.12 | 0.82 | conserved N-term acylated            |
| Tb927.7.5060   | 3.99 | 1.32 | Batten's disease cln3 like           |
| Tb927.8.8030   | 3.96 | 1.16 | conserved - TM                       |
| Tb927.1.4650   | 3.93 | 1.27 | F-box protein                        |
| Tb927.8.6720   | 3.92 | 1.06 | conserved - TM                       |
| Tb927.5.4010   | 3.89 | 1.3  | unique - sig seq                     |
| Tb10.70.0040   | 3.88 | 1.36 | yeast PNS1 unknown function          |
| Tb927.6.560    | 3.85 | 1.28 | TbCATB cys protease                  |
| Tb11.02.1565   | 3.83 | 1.02 | leucine rich repeat near VSGs        |

|                |      |      |                                            |
|----------------|------|------|--------------------------------------------|
| Tb927.8.2080   | 3.81 | 1.12 | hypothetical conserved near snoRNAs        |
| Tb927.6.440    | 3.77 | 1.05 | HpHb receptor                              |
| Tb09.244.2160  | 3.76 | 1.65 | unique between RHS and ESAG                |
| Tb927.4.4860   | 3.75 | 1.19 | amino acid transporter                     |
| Tb927.7.300    | 3.74 | 1.12 | UDP-Ga/UDP-GlcNAc glycosyltransferase      |
| Tb10.70.1850   | 3.74 | 1.21 | ZC3H32                                     |
| Tb927.8.2070   | 3.73 | 0.95 | conserved                                  |
| Tb927.1.1500   | 3.7  | 0.98 | conserved                                  |
| Tb927.8.3720   | 3.69 | 1.36 | conserved - TM                             |
| Tb927.4.3980   | 3.66 | 1.22 | DNA J                                      |
| Tb927.4.5310   | 3.64 | 1.22 | S/T PKA                                    |
| Tb927.8.3170   | 3.63 | 1.05 | conserved                                  |
| Tb927.5.370    | 3.63 | 1.02 | ISG75                                      |
| Tb927.8.4430   | 3.61 | 1.01 | nucleoside (uridine) phosphorylase         |
| Tb927.7.4650   | 3.6  | 1.38 | SNF2 DNA repair protein                    |
| Tb10.70.1370   | 3.59 | 1.47 | fructose-bisphosphate aldolase, glycosomal |
| Tb927.8.7100   | 3.58 | 0.87 | S/T protein kinase PKA?                    |
| Tb10.70.5230   | 3.56 | 1.25 | TM with DNA J domain                       |
| Tb927.5.1440   | 3.53 | 0.97 | downstream of ISG64 related to ESAG8       |
| Tb927.3.2610   | 3.53 | 1.21 | GPI inositol deacylase 2                   |
| Tb11.02.0730   | 3.48 | 1.21 | metacaspase 1                              |
| Tb927.2.6150   | 3.47 | 1    | AT2 adenosine transporter 2                |
| Tb10.70.3070   | 3.39 | 1.16 | TFIIF-stimulated CTD phosphatase           |
| Tb10.70.5060   | 3.36 | 1.5  | conserved (calpain like cys protease?)     |
| Tb927.8.4060   | 3.33 | 3.54 | flagellum adhesion glycoprotein            |
| Tb927.7.1300   | 3.25 | 1.6  | protein disulphide isomerase               |
| Tb927.4.3480   | 3.22 | 1.15 | unique - TM                                |
| Tb927.5.3660   | 3.2  | 1.21 | conserved                                  |
| Tb927.2.2490   | 3.18 | 1.71 | unique - TM                                |
| Tb11.47.0001   | 3.16 | 1.42 | TM ISG65-related                           |
| Tb11.01.0220   | 3.16 | 1.84 | conserved                                  |
| Tb09.211.4740  | 3.11 | 1.02 | conserved methyltransferase?               |
| Tb10.61.2670   | 3.08 | 1.45 | conserved                                  |
| Tb10.61.2650   | 3.08 | 1.3  | aquaglyceroporin                           |
| Tb11.02.3050   | 3.07 | 1.25 | conserved - TM                             |
| Tb10.389.0390  | 3.07 | 1.22 | conserved - TM                             |
| Tb10.6k15.0880 | 3.04 | 1.08 | unique                                     |
| Tb11.02.5680   | 3.02 | 1.6  | conserved - TM                             |
| Tb927.2.1700   | 3.01 | 1.19 | conserved - TM                             |
| Tb927.8.4340   | 2.97 | 1.15 | conserved - TM                             |
| Tb927.4.2380   | 2.97 | 1.08 | sarcalumenin                               |
| Tb927.6.410    | 2.96 | 0.96 | conserved                                  |

|                |      |      |                                                   |
|----------------|------|------|---------------------------------------------------|
| Tb927.6.400    | 2.95 | 0.86 | peptidase M20/M25/M40                             |
| Tb11.02.3950   | 2.91 | 1.64 | ABC transporter                                   |
| Tb927.8.4890   | 2.89 | 1.23 | sig seq ERO1                                      |
| Tb927.5.2000   | 2.89 | 0.99 | unique                                            |
| Tb927.3.4100   | 2.89 | 2.5  | conserved - TM                                    |
| Tb11.01.7530   | 2.88 | 1.51 | conserved - TM                                    |
| Tb927.3.4230   | 2.85 | 1.78 | serine peptidase, clan SB, family S8-like protein |
| Tb927.5.2330   | 2.84 | 0.81 | conserved P13K domain                             |
| Tb927.8.6590   | 2.81 | 1.04 | conserved glut-S-transferase - sig seq            |
| Tb927.6.940    | 2.81 | 0.98 | cysteine peptidase, Clan CD, family C13, putative |
| Tb11.02.2730   | 2.81 | 0.90 | conserved - TM                                    |
| Tb10.70.7090   | 2.81 | 1.37 | serine peptidase, Clan SC, Family S10             |
| Tb11.01.2580   | 2.8  | 1.77 | conserved pumilio RNA bp                          |
| Tb927.2.2770   | 2.79 | 2.12 | conserved                                         |
| Tb11.12.0008   | 2.79 | 1.13 | conserved - TM                                    |
| Tb927.3.5080   | 2.78 | 3.69 | conserved                                         |
| Tb10.389.0920  | 2.77 | 1.18 | conserved                                         |
| Tb11.01.6140   | 2.76 | 1.85 | conserved                                         |
| Tb927.5.1990   | 2.75 | 1.4  | unique - sig seq                                  |
| Tb927.6.1330   | 2.72 | 1.03 | unique - sig seq                                  |
| Tb09.160.3740  | 2.7  | 1.16 | conserved                                         |
| Tb927.8.6450   | 2.68 | 1.98 | inhibitor of cysteine peptidase chagasin family   |
| Tb927.8.4110   | 2.68 | 2.12 | flagellum-adhesion glycoprotein                   |
| Tb927.2.5320   | 2.67 | 0.75 | conserved - TM                                    |
| Tb10.70.5020   | 2.67 | 0.64 | IFT81                                             |
| Tb927.6.2830   | 2.65 | 1.38 | RabGAP GYP1                                       |
| Tb10.70.3660   | 2.65 | 0.90 | proteasome activator protein PA26                 |
| Tb11.47.0026   | 2.63 | 1.55 | conserved                                         |
| Tb10.70.4700   | 2.63 | 0.90 | splicing factor PTSR1 interacting protein         |
| Tb11.02.2210   | 2.61 | 0.87 | protein kinase A regulatory subunit               |
| Tb10.6k15.1690 | 2.61 | 1.22 | conserved - TM                                    |
| Tb10.389.1780  | 2.61 | 1.21 | sig seq conserved                                 |
| Tb11.01.3580   | 2.59 | 1.05 | conserved                                         |
| Tb927.7.4500   | 2.58 | 0.68 | conserved                                         |
| Tb927.4.2520   | 2.58 | 0.94 | SIR2 deacetylase                                  |
| Tb10.389.1250  | 2.58 | 1.36 | conserved - TM                                    |
| Tb927.8.7270   | 2.57 | 0.99 | conserved ERGIC Golgi                             |
| Tb927.7.3000   | 2.56 | 0.85 | kinesin, putative                                 |
| Tb927.5.2300   | 2.56 | 1.00 | formin, putative                                  |
| Tb09.v1.0650   | 2.56 | 1.14 | conserved - TM                                    |
| Tb11.02.2780   | 2.54 | 1.07 | conserved TPR domain                              |
| Tb10.70.2020   | 2.54 | 1.03 | ZC3H31 zinc finger                                |

|               |      |      |                                              |
|---------------|------|------|----------------------------------------------|
| Tb09.211.4240 | 2.53 | 1.22 | phosphoinositide-binding protein, nexin 2    |
| Tb927.7.5790  | 2.52 | 1.28 | protein disulphide isomerase                 |
| Tb09.211.2410 | 2.52 | 1.11 | protein kinase A catalytic subunit           |
| Tb927.6.1460  | 2.51 | 1.12 | cyclin 3                                     |
| Tb927.3.3270  | 2.51 | 0.52 | phosphofructokinase-6-phospho-1-fructokinase |
| Tb11.12.0016  | 2.51 | 1.18 | glutathionylspermidine synthetase            |
| Tb11.02.5280  | 2.51 | 1.00 | glycerol-3-phosphate dehydrogenase           |
| Tb927.8.3730  | 2.5  | 1.03 | conserved - TM                               |
| Tb927.3.5410  | 2.5  | 1.04 | conserved - TM                               |
| Tb11.02.2470  | 2.5  | 1.37 | conserved possible E3 Ub lig                 |
