# Supplementary material
Source: PubMed Central journal article supplement (PMC2823576)
Supplement: jcs.058511_16.pdf [file jcs.058511_16.pdf]

**Table S5:** Genes down-regulated in bloodstream form cells (ratio bloodstream/procyclic <0.4) are shown in comparison with their ratio on dhh1 E182Q expression (induced/uninduced).

| gene ID        | bloodstream/<br>procyclic | dhh1 E182Q<br>induced/<br>uninduced | identity                                         |
|----------------|---------------------------|-------------------------------------|--------------------------------------------------|
|                | microarray                | microarray                          |                                                  |
| Tb927.5.2260   | 0.09                      | 0.38                                | conserved META domain                            |
| Tb10.61.0980   | 0.10                      | 0.23                                | glycosomal malate dehydrogenase                  |
| Tb10.389.0770  | 0.10                      | 1.30                                | ZC3H37                                           |
| Tb11.02.4150   | 0.11                      | 0.65                                | pyruvate phosphate dikinase                      |
| Tb927.5.2170   | 0.12                      | 0.36                                | conserved META domain                            |
| Tb927.7.2640   | 0.13                      | 0.78                                | conserved                                        |
| Tb927.5.4020   | 0.13                      | 2.10                                | unique - sig seq                                 |
| Tb927.8.6170   | 0.13                      | 0.62                                | putative transketolase                           |
| Tb09.160.5480  | 0.14                      | 0.51                                | purine nucleoside transporter                    |
| Tb927.7.3020   | 0.15                      | 0.75                                | FMN nitroreductase?                              |
| Tb10.6k15.2020 | 0.15                      | 0.98                                | glucose transporter 2A                           |
| Tb10.6k15.3510 | 0.15                      | 1.31                                | CRAM                                             |
| Tb927.5.1060   | 0.16                      | 0.79                                | mitochondrial processing peptidase, beta subunit |
| Tb927.4.3500   | 0.17                      | 0.72                                | conserved - TM                                   |
| Tb927.5.2210   | 0.17                      | 0.98                                | conserved META domain                            |
| Tb11.02.0445   | 0.17                      | 1.01                                | conserved - sig seq                              |
| Tb927.5.2560   | 0.18                      | 0.95                                | conserved - TM                                   |
| Tb11.02.3860   | 0.18                      | 1.66                                | major facilitator superfamily                    |
| Tb927.4.4940   | 0.19                      | 0.86                                | conserved                                        |
| Tb927.7.2680   | 0.19                      | 0.61                                | ZC3H22                                           |
| Tb10.6k15.0280 | 0.20                      | 1.04                                | conserved esterase/lipase domain                 |
| Tb927.7.4970   | 0.20                      | 1.45                                | glutamine synthetase                             |
| Tb927.7.5950   | 0.20                      | 1.14                                | major facilitator superfamily                    |
| Tb11.02.1480   | 0.20                      | 1.16                                | mitochondrial processing peptidase alpha subunit |
| Tb927.8.2540   | 0.21                      | 0.41                                | 3-ketoacyl-CoA thiolase, putative                |
| Tb10.70.2970   | 0.21                      | 1.05                                | Cytochrome bd ubiquinol oxidase, 14 kDa subunit  |
| Tb09.160.4310  | 0.21                      | 0.41                                | glutamate dehydrogenase                          |
| Tb927.1.4100   | 0.22                      | 0.96                                | cytochrome oxidase subunit IV                    |
| Tb11.02.5400   | 0.22                      | 0.60                                | cystathionine beta-synthase, putative            |
| Tb927.4.4620   | 0.22                      | 1.55                                | cytochrome oxidase subunit VIII                  |
| Tb927.8.4100   | 0.22                      | 0.56                                | conserved - TM                                   |
| Tb11.01.4702   | 0.23                      | 1.34                                | cytochrome oxidase subunit X                     |
| Tb10.26.0790   | 0.23                      | 1.12                                | PSSA-2 surface glycoprotein                      |
| Tb927.3.700    | 0.23                      | 0.84                                | conserved - TM                                   |

|                |      |      |                                                          |
|----------------|------|------|----------------------------------------------------------|
| Tb11.02.5490   | 0.24 | 1.39 | conserved - TM                                           |
| Tb927.8.1890   | 0.24 | 0.98 | cytochrome c1, heme protein, mitochondrial               |
| Tb927.3.4500   | 0.25 | 0.88 | fumarate hydratase, putative                             |
| Tb11.01.6650   | 0.25 | 1.04 | serine/threonine-protein kinase, putative NIMA-like      |
| Tb11.02.4520   | 0.25 | 1.00 | amino acid permease/transporter, putative                |
| Tb09.v1.0420   | 0.26 | 1.02 | conserved - TM                                           |
| Tb09.160.2910  | 0.26 | 0.74 | tricarboxylate carrier, putative                         |
| Tb11.02.4080   | 0.26 | 0.79 | lanosterol 14-alpha-demethylase, cytochrome P450         |
| Tb10.6k15.2900 | 0.27 | 0.58 | ABC transporter, putative                                |
| Tb10.6k15.2180 | 0.27 | 1.79 | cytochrome oxidase subunit IX                            |
| Tb10.100.0160  | 0.27 | 1.79 | cytochrome oxidase subunit VI                            |
| Tb927.3.2880   | 0.28 | 1.04 | conserved - sig seq                                      |
| Tb11.01.8200   | 0.29 | 1.04 | enoyl-CoA hydratase/isomerase family protein, putative   |
| Tb927.7.7430   | 0.29 | 0.96 | ATP synthase F1 alpha chain, mitochondrial precursor     |
| Tb09.211.1030  | 0.29 | 1.00 | phosphatidylcholine:ceramide cholinephosphotransferase 2 |
| Tb927.1.2260   | 0.29 | 0.33 | calpain-like protein fragment, putative                  |
| Tb09.244.2660  | 0.29 | 1.06 | conserved, tetratricopeptide repeat                      |
| Tb927.7.5550   | 0.29 | 2.09 | conserved TLD domain                                     |
| Tb11.01.3860   | 0.30 | 1.34 | conserved - sig seq                                      |
| Tb11.01.1740   | 0.30 | 0.84 | 2-oxoglutarate dehydrogenase E1 component                |
| Tb10.389.0690  | 0.30 | 0.79 | mitochondrial 2-oxoglutarate/malate carrier protein      |
| Tb927.3.1690   | 0.30 | 0.91 | conserved                                                |
| Tb10.6k15.3610 | 0.31 | 1.33 | delta-6 fatty acid desaturase                            |
| Tb927.4.4730   | 0.31 | 0.87 | amino acid transporter                                   |
| Tb10.26.0280   | 0.31 | 1.08 | conserved PSP1 domain                                    |
| Tb11.02.4485   | 0.31 | 0.76 | cytochrome b5, putative                                  |
| Tb927.3.3330   | 0.31 | 1.02 | heat shock protein 20, putative                          |
| Tb927.2.2140   | 0.31 | 1.15 | conserved - TM                                           |
| Tb927.3.1410   | 0.32 | 2.22 | cytochrome oxidase subunit VII                           |
| Tb927.1.2100   | 0.32 | 0.60 | cysteine peptidase, Clan CA, family C2, putative         |
| Tb09.211.4700  | 0.32 | 0.68 | reiske iron-sulfur protein , mitochondrial precursor     |
| Tb10.70.2320   | 0.32 | 1.65 | sig seq conserved                                        |
| Tb11.02.5500   | 0.33 | 1.25 | conserved - TM                                           |
| Tb10.70.7760   | 0.33 | 0.81 | conserved - TM                                           |
| Tb11.02.2310   | 0.33 | 0.46 | prostaglandin f synthase                                 |
| Tb10.389.0070  | 0.33 | 0.66 | elongation factor TU, putative mitochondrial?            |
| Tb927.2.4200   | 0.33 | 0.86 | protein kinase, plant homologues                         |
| Tb927.6.3880   | 0.33 | 0.95 | conserved                                                |
| Tb927.1.1470   | 0.33 | 1.24 | conserved                                                |
| Tb11.02.4120   | 0.34 | 0.98 | conserved - sig seq                                      |
| Tb11.55.0023   | 0.34 | 0.65 | conserved                                                |
| Tb927.7.5960   | 0.34 | 2.24 | major facilitator superfamily                            |

|                |      |      |                                                   |
|----------------|------|------|---------------------------------------------------|
| Tb927.7.5980   | 0.35 | 1.99 | major facilitator superfamily                     |
| Tb927.7.4270   | 0.35 | 1.01 | conserved - TM                                    |
| Tb11.01.3610   | 0.35 | 0.92 | membrane-bound acid phosphatase, putative         |
| Tb927.3.680    | 0.35 | 1.21 | cytochrome P450, putative                         |
| Tb11.01.7170   | 0.35 | 1.02 | C-14 sterol reductase, putative                   |
| Tb927.7.1790   | 0.35 | 0.78 | adenine phosphoribosyltransferase, putative       |
| Tb11.01.3915   | 0.35 | 4.21 | RBP5                                              |
| Tb09.160.4380  | 0.35 | 1.15 | succinate dehydrogenase, putative                 |
| Tb927.1.2230   | 0.36 | 0.49 | calpain-like protein fragment, putative           |
| Tb927.7.210    | 0.36 | 1.67 | proline dehydrogenase                             |
| Tb927.7.4070   | 0.36 | 0.50 | cysteine peptidase, Clan CA, family C2, putative  |
| Tb927.8.4010   | 0.36 | 0.64 | flagellum-adhesion glycoprotein                   |
| Tb09.160.1070  | 0.37 | 0.56 | sig seq conserved methyl transferase domain       |
| Tb927.3.4650   | 0.37 | 0.65 | C-8 sterol isomerase, putative                    |
| Tb927.5.2160   | 0.37 | 1.05 | conserved META domain                             |
| Tb927.5.930    | 0.37 | 0.76 | NADH-dependent fumarate reductase                 |
| Tb09.160.4840  | 0.37 | 1.05 | conserved                                         |
| Tb11.02.2450   | 0.37 | 1.38 | conserved - TM                                    |
| Tb10.70.5380   | 0.37 | 0.79 | pyruvate dehydrogenase complex E3 binding protein |
| Tb10.406.0240  | 0.37 | 0.78 | dual-specificity phosphatase                      |
| Tb927.5.2430   | 0.37 | 1.79 | transporter MatE superfamily                      |
| Tb927.5.2570   | 0.38 | 0.93 | eIF3B                                             |
| Tb11.39.0005   | 0.38 | 1.33 | conserved - TM                                    |
| Tb927.6.2030   | 0.38 | 1.19 | protein kinase MEK/MAP/NPK                        |
| Tb927.8.1630   | 0.39 | 1.51 | GP63                                              |
| Tb10.6k15.2490 | 0.39 | 1.03 | TFIIF-stimulated CTD phosphatase                  |
| Tb927.6.4990   | 0.39 | 0.88 | ATP synthase, epsilon chain, putative             |
| Tb927.7.7090   | 0.39 | 1.44 | conserved - TM                                    |
| Tb927.3.2180   | 0.39 | 0.93 | conserved - TM                                    |
| Tb11.02.0620   | 0.40 | 1.01 | nucleolar GTP-binding protein 1                   |
| Tb927.2.4700   | 0.40 | 0.98 | conserved - TM                                    |
| Tb09.211.3500  | 0.40 | 2.02 | conserved - sig seq                               |
| Tb09.244.2460  | 0.40 | 1.80 | BARP                                              |
| Tb10.70.6340   | 0.40 | 0.71 | ATPase subunit 9, putative                        |
| Tb11.02.5660   | 0.40 | 0.80 | conserved - sig seq                               |
