# Supplementary material
Source: PubMed Central journal article supplement (PMC2823576)
Supplement: jcs.058511_17.pdf [file jcs.058511_17.pdf]

```

Sc      MGSINNNFNTNNNSNTDLDRDWKTALNIPKKDTRPQTDDVLNTKGNTFEDFYLKRELLMG 60
Tb      -----MVTDDDWREGLKAPTkdvrkkTEDVESRRNVTFEEYGLRRELQMG 45
              * *: .*: *.**.* :*:** . .: ***: :*:*** **

              Q                               I
Sc      IFEAGFEKPSPIQEEAIPVAITGRDILARAKNGTGKTAAFVIPTLEKVKPKLNKIQALIM 120
Tb      IFEKGFERPSPVQEEAIPVALQGDVLAARAKNGTGKTASFVIPVLEKVDTQLPHIQALLM 105
              *** ***:***:*****: *:*:***:*****:*****.***.:. * :****:*

              Ia                               Ib
Sc      VPTRELALQTSQVVRTLgkHC-GISCMVTTGGTNLRDDILRLNETVHILVGTpGRVLDLA 179
Tb      VPTRELALQTAQVTkELGKHITGLEVMVTTGGTTLRDDILRLQSVVHVLVATpGRAVDLA 165
              *****:*. .: ***** *:. *****.*****:..**:*.*.***.:.***

              II                               III
Sc      SRKVADLSDCSLFIMDEADKMLSRDFKTIIEQILSFLPPTHQSLLFSATFPLTVKEFMVK 239
Tb      SKGTAKLDHCRIIVLDEADKLLSQEFTSLMRDLYGFLPKGRQSLLFSATFPVTVKDFADK 225
              *: .*.**.* :*:*:***:***:*:*. .: .: .*** :*****:***:* *

              IV
Sc      HLHKPYEINLMEELTLKGITQYYAFVEERQKLHCLNTLFSKLQINQAIIFCNSTNRVELL 299
Tb      YLRNPYEINLMEELTLRGVTQYYAFVEERQKIHCLNTLfnRLQINQSIFCNSVNRVELL 285
              .*:*****:*.*****:*****.*****:*****.*****

              V
Sc      AKKITDLGYSCYYSHARMKQqERNKVFHEFRQgKVRTLVCSDLLTRGIDIQAVNVVINFD 359
Tb      AKKITQLGYSCYYIHARMQqHRNRVfhDFREGHCRNLVCSDLITRGIDIQAVNVVINFD 345
              *****:***** *****:*.**.*:***:***:*.*****:***:*****

              VI
Sc      FPKTAETYLHRIGRSGRFGHGLGLAINLINWnDRFNLYKIEQELGTEIAAIPATIDKSLYV 419
Tb      FPKYAETYLHRIGRSGRFGHGLGLAINFVTYEDRHNVYRIEQELDTEIKPIPAEVDPELYT 405
              *** *****:.....:*.**.*:***:***.*** .*** :* .**

Sc      AENDETVPVPFPIEQQSYHQQAIPQQQLPSQQQFAIPQqHHPqFMVPPSHQQQQAYPPP 479
Tb      A----- 406
              *

Sc      QMPSQQGYPPQqEHFMAMPPGQSQPQY 506
Tb      -----

```

**Figure S1.** Alignment of *S. cerevisiae* Dhh1 and *T. brucei* DHH1 prepared using Clustal W. The conserved motifs of DEAD box helicases are highlighted in red. The amino acids mutated in this work are framed in blue.
