# Supplementary material
Source: PubMed Central journal article supplement (PMC2823576)
Supplement: jcs.058511_18.pdf [file jcs.058511_18.pdf]

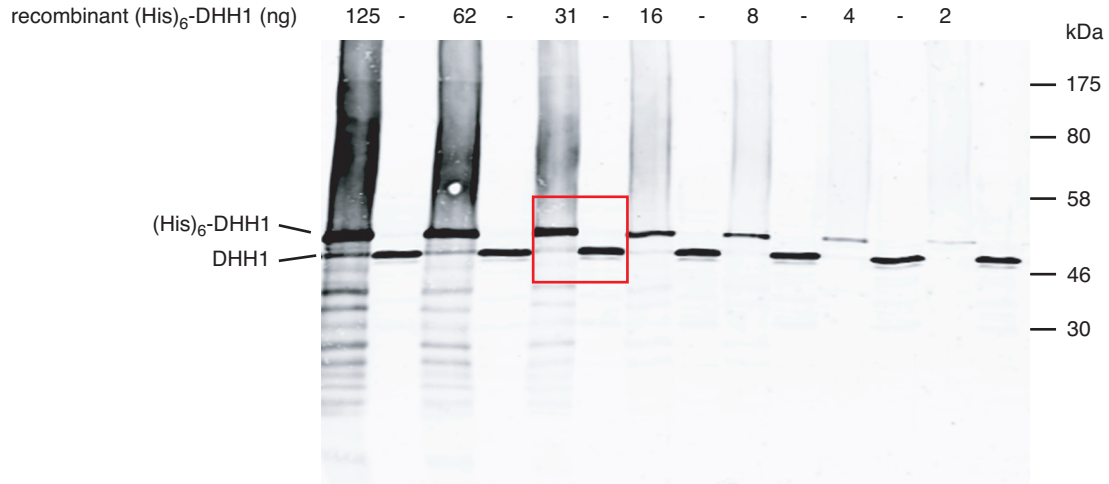

Western blot probed with anti-DHH1

**Figure S2: Estimation of the copy number of DHH1**

A titration of recombinant DHH1 protein was used to estimate the concentration of DHH1 protein per procyclic trypanosome cell by Western blot.  $1 \times 10^6$  trypanosomes cells contain about 30 ng DHH1 protein (red frame). This is 400,000 DHH1 molecules per cell.
