# Supplementary material
Source: PubMed Central journal article supplement (PMC2823576)
Supplement: jcs.058511_19.pdf [file jcs.058511_19.pdf]

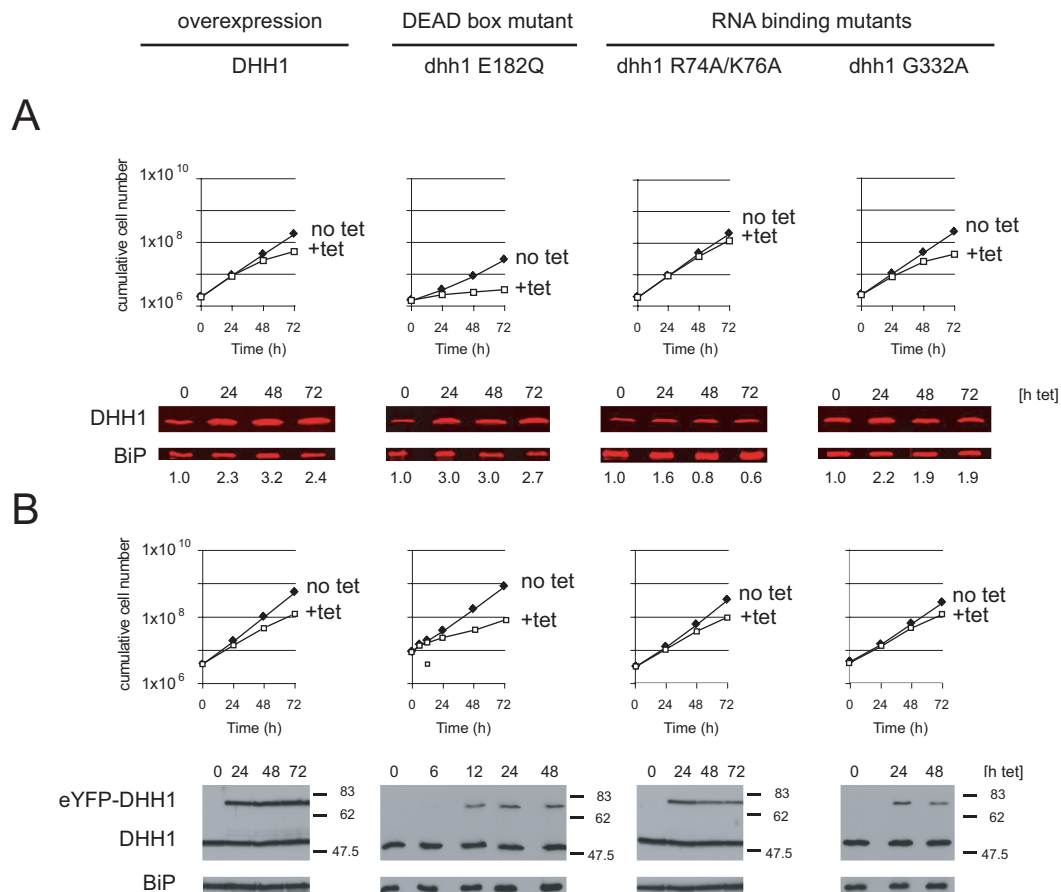

**Figure S3.** Growth phenotype after expression of DHH1 wild type and mutants in two further clones for each transgene. The DHH1 was either untagged (A) or as an N-terminally tagged eYFP fusion (B). Growth and DHH1 protein were monitored over a time-course of induction.
