# Supplementary material
Source: PubMed Central journal article supplement (PMC2823576)
Supplement: jcs.058511_21.pdf [file jcs.058511_21.pdf]

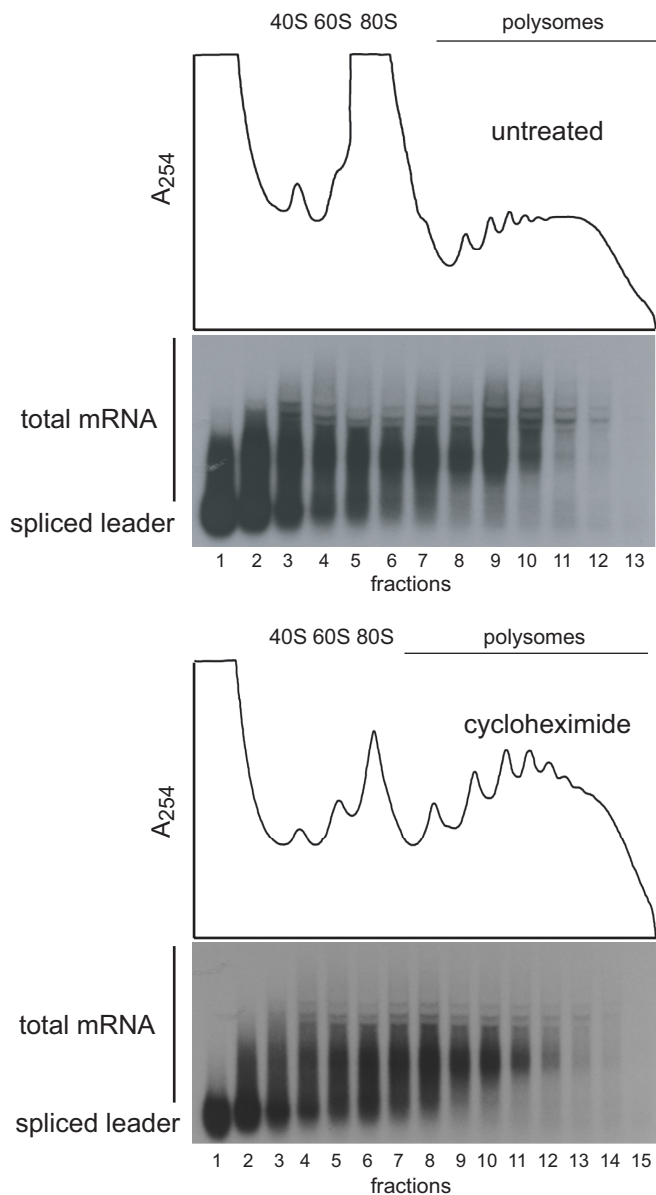

**Figure S5:**

Comparison of mRNA distribution in a polysome fraction with and without cycloheximide pretreatment. RNA was isolated from fractions of a sucrose density gradient loaded with either untreated cells (top) or cells that had been treated with cycloheximide (50  $\mu$  g/ml) for 30 minutes prior to harvesting and during harvesting and washing (bottom). Total mRNA was detected with an antisense oligo recognizing the spliced leader. Absorbance profiles at 254 nm are shown.
