# Supplementary material
Source: PubMed Central journal article supplement (PMC2823576)
Supplement: jcs.058511_22.pdf [file jcs.058511_22.pdf]

A

## expression of dhh1 E182Q

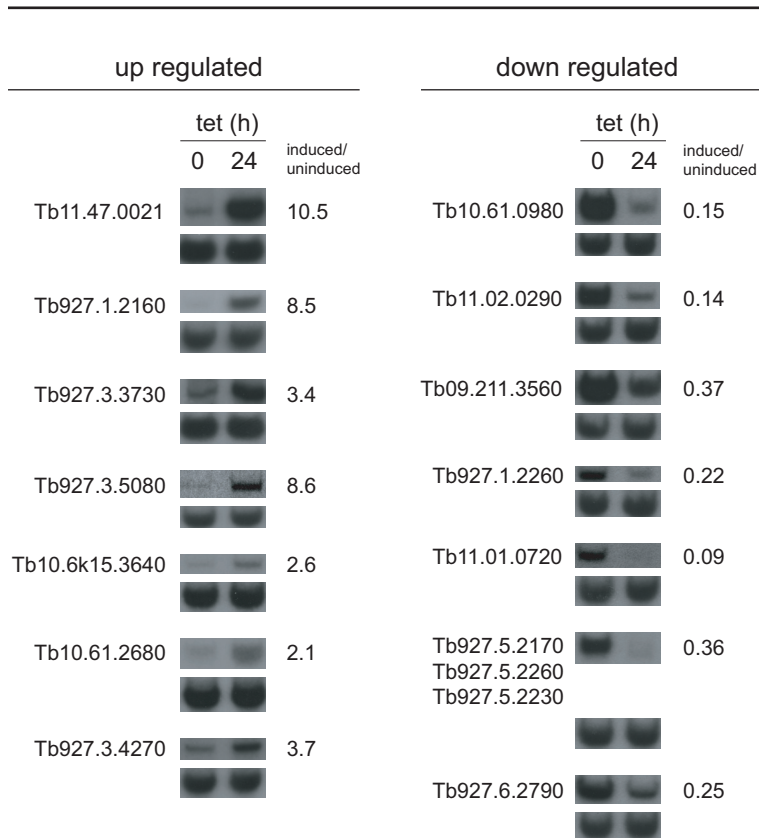

B

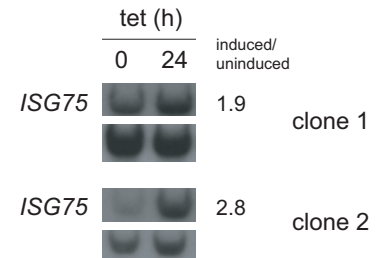**Figure S6: Validation of the microarray data by northern blot**

**A)** Northern blots with RNA of cells that were induced to express dhh1 E182Q for 0 or 24 hours were probed for genes that were found to be up-regulated or down-regulated by microarray (see Table 1 and 2). Average values of two independent experiments are shown. Blots were reprobbed for ribosomal RNA to control loading.

**B)** The increase in *ISG75* mRNA following the expression of dhh1 E182Q was confirmed for two independent clonal cell populations. Blots were reprobbed for ribosomal RNA to control loading.
