# Supplementary material
Source: PubMed Central journal article supplement (PMC2823576)
Supplement: jcs.058511_23.pdf [file jcs.058511_23.pdf]

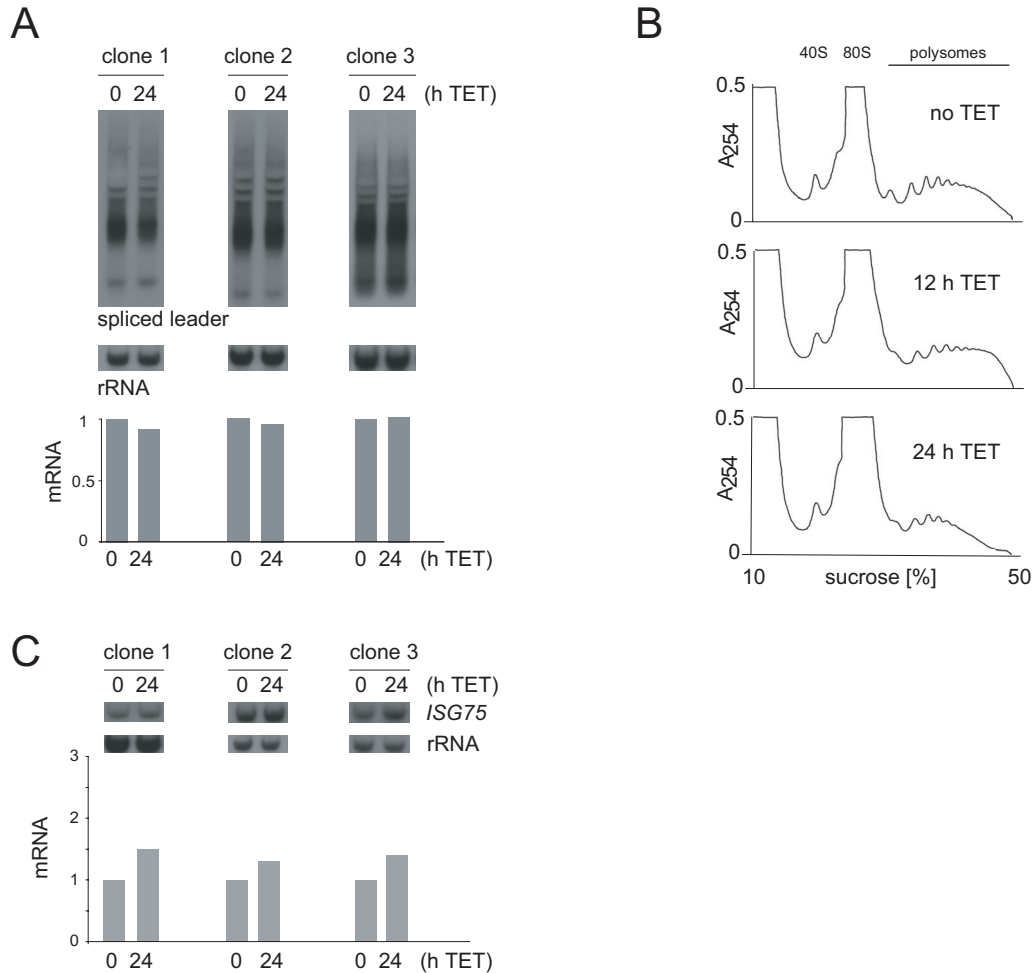

**Figure S7: Changes in mRNA levels and polysomes following DHH1 overexpression**

A) Total mRNA was measured after induction of DHH1 overexpression by probing northern blots for the spliced leader present on all mRNAs in three independent clonal cell lines.

B) Polysome analysis after induction of DHH1 overexpression (clone 3).

C) *Isg75* mRNA was measured after induction of DHH1 overexpression in three independent clonal cell lines.
