# Supplementary material
Source: PubMed Central journal article supplement (PMC2823576)
Supplement: jcs.058511_24.pdf [file jcs.058511_24.pdf]

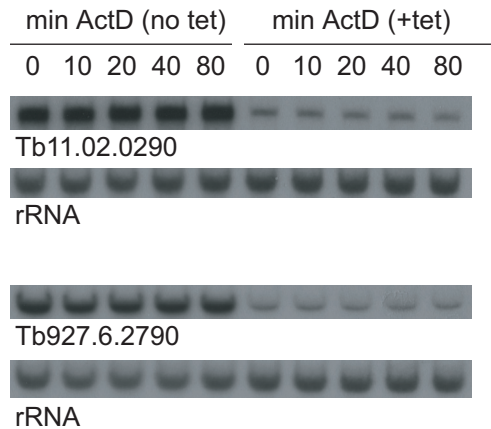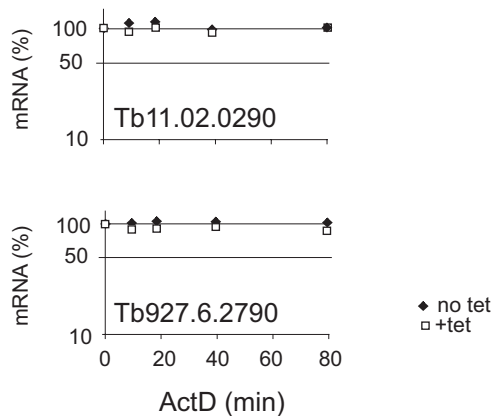

**Figure S8. Two of the down-regulated genes have very long half-lives.**

mRNA half-lives of two genes that are down-regulated were assayed by following the decay of the mRNA after inhibition of transcription by Actinomycin D with or without induction of dhh1 E182Q overexpression for 12 hours. Both half-lives were too long to be determined with any confidence using this method.
