# Supplementary material
Source: PubMed Central journal article supplement (PMC2823576)
Supplement: jcs.058511_25.pdf [file jcs.058511_25.pdf]

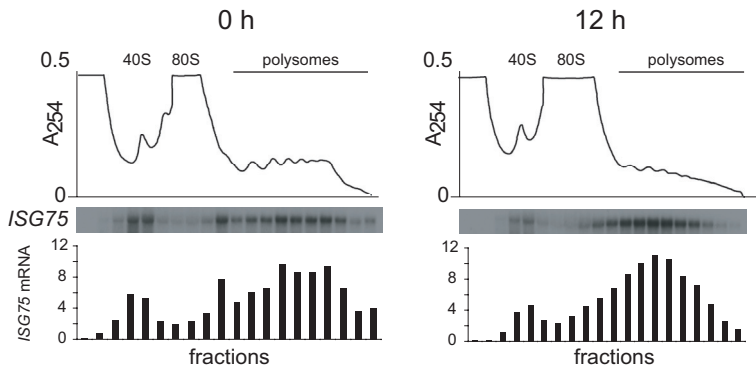

**Figure S9: Distribution of *ISG75* mRNA across polysome fractions before and after 12 h induction of *dhh1* E182Q expression**

RNA was isolated from polysome analysis fractions and *ISG75* mRNA was detected by quantitative northern blots. Absorbance profiles at 254 nm are shown.
