# Supplementary material
Source: PubMed Central journal article supplement (PMC2823576)
Supplement: jcs.058511_26.pdf [file jcs.058511_26.pdf]

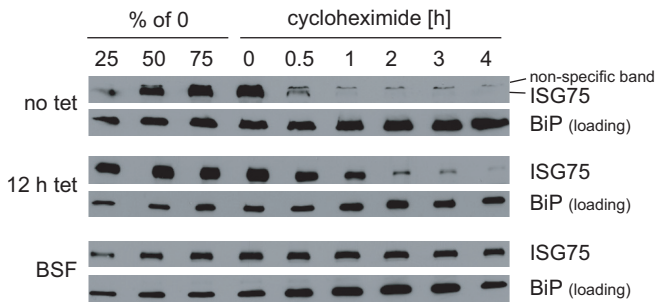

### Figure S10: ISG75 protein half-life

Uninduced cells (no tet), cells induced to express the dhh1 E182Q mutant (12 h tet) and bloodstream form cells (BSF) were incubated with cycloheximide (50  $\mu\text{g}/\text{ml}$ ) over a time-course and ISG75 protein was detected on a Western blot. A titration of the untreated sample was used for quantification.
