# Supplementary material
Source: PubMed Central journal article supplement (PMC2823576)
Supplement: jcs.058511_27.pdf [file jcs.058511_27.pdf]

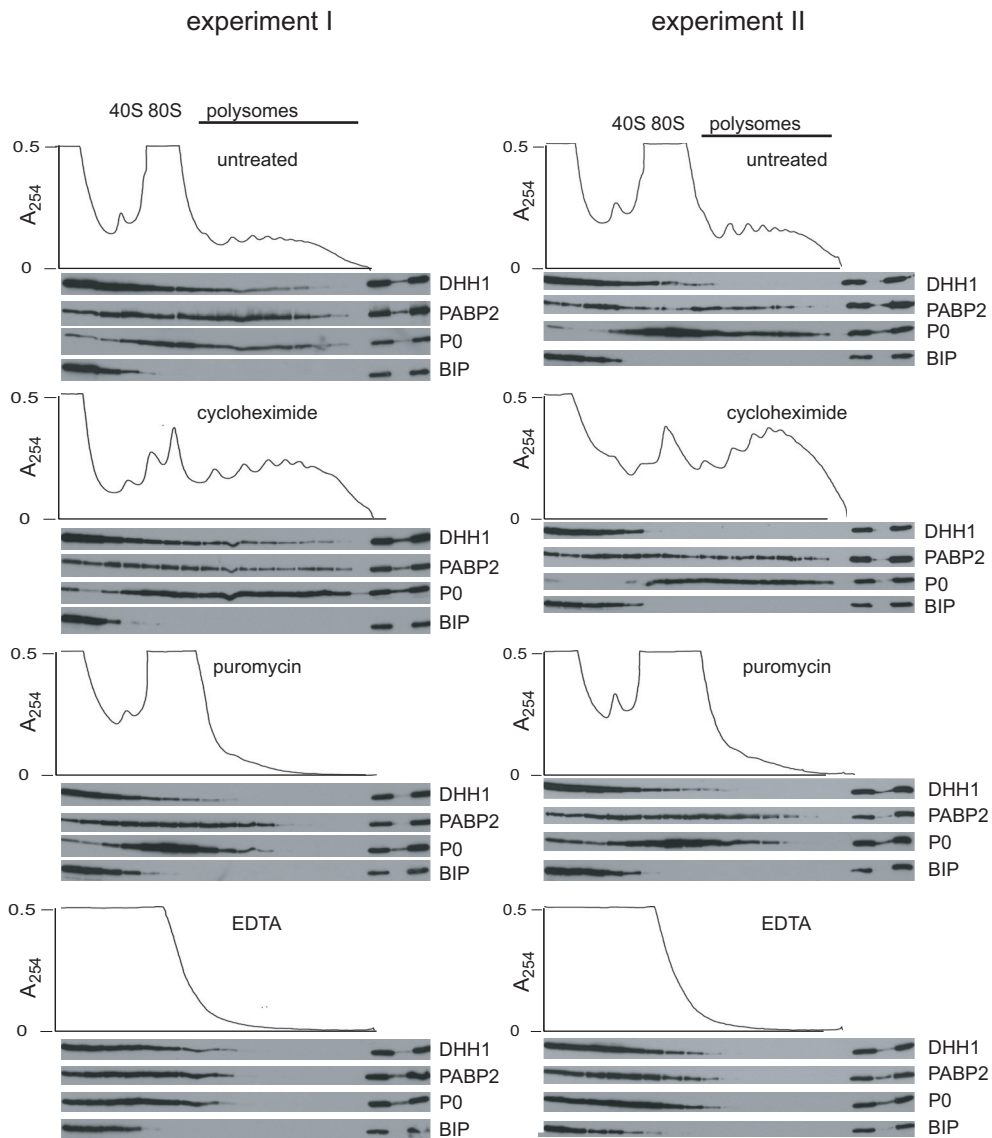

Figure S11: The majority of DHH1 is not associated with polysomes  
DHH1 was detected in sucrose gradient fractions by western blot. Cells were either untreated, treated with cycloheximide before and during harvesting (30 min, 50 µg/ml), treated with puromycin before and during harvesting (30 min, 50 µg/ml) or the cell lysate was treated with EDTA (50 mM, 30 min on ice). As controls served Poly(A) binding protein 2 (PABP2, which carried a C-terminal ty1 tag and was detected with the BB2 antibody), a protein of the large ribosomal subunit P0 (anti-TcP0) and BIP (anti-BIP). Data of two independent experiments are shown.
