# Supplementary material
Source: PubMed Central journal article supplement (PMC2823576)

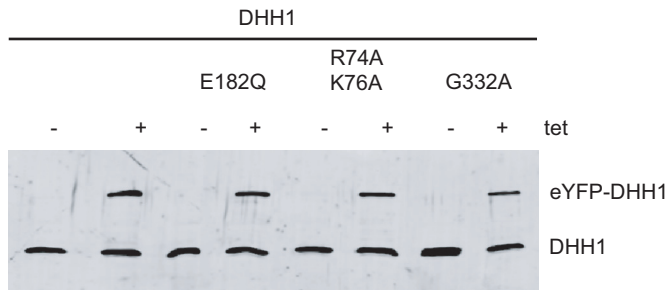

**Figure S4.**

Western blot showing the expression of eYFP-DHH1 and eYFP-dhh1 mutants after 12 h induction.

Supplement: jcs.058511_20.pdf [file jcs.058511_20.pdf]
